# Supplementary material
Source: PubMed Central journal article supplement (PMC7724926)
Supplement: NIHMS1629910-supplement-Supplementary__Tables.pdf [file NIHMS1629910-supplement-Supplementary__Tables.pdf]

## SUPPLEMENTARY TABLES

**eTable 1.** Information Relating to all Twenty Participating COSMIC Studies

| Study                                                     | Abbreviation | Location                        | Main race/ethnicity        | Sample size | Years run | Reference                            |
|-----------------------------------------------------------|--------------|---------------------------------|----------------------------|-------------|-----------|--------------------------------------|
| Bambui Cohort Study of Aging                              | Bambui       | Bambui, Brazil                  | Brazilian                  | 1491        | 1997–2013 | Lima-Costa et al. <sup>1</sup>       |
| Cognitive Function & Ageing Study                         | CFAS         | United Kingdom†                 | White                      | 12256       | 1989–     | Brayne et al. <sup>2</sup>           |
| Cuban Health and Alzheimer Study                          | CHAS         | Havana and Matanzas, Cuba       | White, Black, Mixed        | 2574        | 2003–     | Llibre-Rodriguez et al. <sup>3</sup> |
| Einstein Aging Study                                      | EAS          | New York, USA                   | White, Black               | 2063        | 1993–     | Katz et al. <sup>4</sup>             |
| Etude Santé Psychologique et Traitement                   | ESPRIT       | Montpellier, France             | White                      | 2187        | 1999–     | Ritchie et al. <sup>5</sup>          |
| Hellenic Longitudinal Investigation of Aging and Diet     | HELIAD       | Larissa and Marousi, Greece     | White                      | 1174        | 2010–     | Dardiotis et al. <sup>6</sup>        |
| Hong Kong Memory and Ageing Prospective Study             | HK-MAPS      | Hong Kong                       | Chinese                    | 785         | 2005–     | Wong et al. <sup>7</sup>             |
| Invecchiamento Cerebrale in Abbiategrasso                 | Invece.Ab    | Abbiategrasso, Italy            | White                      | 1267        | 2010–2015 | Guaita et al. <sup>8</sup>           |
| Korean Longitudinal Study on Cognitive Aging and Dementia | KLOSCAD      | South Korea (nation-wide)       | Korean                     | 6513        | 2009–     | Kim et al. <sup>9</sup>              |
| Leipzig Longitudinal Study of the Aged                    | LEILA75+     | Leipzig, Germany                | White                      | 1040        | 1997–2014 | Riedel-Heller et al. <sup>10</sup>   |
| Monongahela Valley Independent Elders Survey              | MoVIES       | Mid-Monongahela Valley, PA, USA | White                      | 1613        | 1987–2002 | Ganguli et al. <sup>12</sup>         |
| Personality and Total Health Through Life Project         | PATH         | Canberra, Australia             | White                      | 2545        | 2001–     | Anstey et al. <sup>13</sup>          |
| Sacramento Area Latino Study on Aging                     | SALSA        | Sacramento Valley, CA, USA      | Hispanic; Mexican ancestry | 1710        | 1998–2008 | Haan et al. <sup>14</sup>            |
| Sasaguri Genkimon Study                                   | SGS          | Sasaguri, Japan                 | Japanese                   | 793         | 2011–     | Narazaki et al. <sup>15</sup>        |
| Singapore Longitudinal Ageing Studies (I)                 | SLASI        | Singapore                       | Chinese                    | 1858        | 2003–     | Feng et al. <sup>16</sup>            |
| Sydney Memory and Ageing Study                            | Sydney MAS   | Sydney, Australia               | White                      | 1037        | 2005–     | Sachdev et al. <sup>18</sup>         |
| Tajiri Project                                            | Tajiri       | Tajiri, Japan                   | Japanese                   | 100         | 1998–2005 | Meguro et al. <sup>19</sup>          |
| Zaragoza Dementia Depression Project                      | ZARADEMP     | Zaragoza, Spain                 | White                      | 4542        | 1994–     | Lobo et al. <sup>20</sup>            |

**eTable 2.** *Ethics approvals for the individual contributing studies.*

| <b>Study</b> | <b>Institutional Review Board</b>                                                                                                                                             |
|--------------|-------------------------------------------------------------------------------------------------------------------------------------------------------------------------------|
| Bambui       | Ethics Boards of the Fundac,ãõ Oswaldo Cruz in Rio de Janeiro and the Instituto Rene´ Rachou of the Fundac,ãõ Oswaldo Cruz in Belo Horizonte, Brazil (14/2007 - CEPESH-CpqRR) |
| CFAS         | Anglia and Oxford Multi-centre Research Ethics Committee (MREC) - 99/5/22; Eastern MREC – 99/5/22; Eastern MREC – 05/MRE05/37; NRES Committee East of England – 05/MRE05/37   |
| CHAS         | Medical University of Havana’s Ethics Committee – Approval 20/01/2003                                                                                                         |
| EAS          | Albert Einstein College of Medicine Institutional Review Board (Approval#1996-175)                                                                                            |
| ESPRIT       | Ethics committee (CCPPRB) of the Kremlin Bicetre hospital (n° registered 99-28)                                                                                               |
| HELIAD       | Institutional Ethics Review Board of the University of Thessaly (BEY846Ψ8N2-32II)                                                                                             |
| HK-MAPS      | Joint Chinese University of Hong Kong-New Territories East Cluster Clinical Research Ethics Committee (CRE-2011.101)                                                          |
| Invece.Ab    | Ethics Committee of the University of Pavia (#3/2009)                                                                                                                         |
| KLOSCAD      | Institutional Review Board of Seoul National University Bundang Hospital, Korea (IRB No. B-0912/089-010)                                                                      |
| LEILA75+     | Ethics committee of the University of Leipzig (C7 79934700)                                                                                                                   |
| MoVIES       | University of Pittsburgh Institutional Review Board (IRB# 961263-0110)                                                                                                        |
| PATH         | Australian National University Human Research Ethics Committee (#M9807, #2002/189, #2006/314, # 2010/542, #2001/2, #2009/039)                                                 |
| SALSA        | University of California, San Francisco Human Research Protection Program Institutional Review Board (IRB#10-00243)                                                           |
| SGS          | Institutional Review Board of the Institute of Health Science, Kyushu University (IHS-2010-22)                                                                                |
| SLASI        | National University of Singapore Institutional Review Board (Reference Code: 04-140)                                                                                          |
| Sydney MAS   | University of New South Wales Human Research Ethics Committee (approval #14327)                                                                                               |
| Tajiri       | Ethical Committee of Tohoku University Graduate School of Medicine (#2012276, #2014160, #20141238, and #20141767)                                                             |
| ZARADEMP     | Ethics committee of the Zaragoza University Hospital (CEICA # CP16/2012)                                                                                                      |

Written consent was exclusively or predominantly obtained from participants in all studies (SPAH obtained oral consent from illiterate participants; CFAS obtained oral consent, countersigned by a witness, from participants with a physical/visual disability).

Further participant consent was not deemed necessary as only fully de-identified data were shared with the analysis team (e.g., as per the Privacy Rule proposed by the National Institute of Health, USA: [http://privacyruleandresearch.nih.gov/research\\_repositories.asp](http://privacyruleandresearch.nih.gov/research_repositories.asp)).

**eTable 3.** Information relating to Dementia diagnosis, Tests of Memory and the MMSE, and Data Relating to Risk Factors in all Participating COSMIC Studies

| Study  | Criteria used to classify dementia                                                                                                                                      | General Cognition test                                                                                                            | Hypertension <sup>a</sup>                                                         | Cardiovascular disease <sup>b</sup>                                                                                                                                                       | Diabetes <sup>c</sup>                                                | Stroke <sup>d</sup>                                                   |
|--------|-------------------------------------------------------------------------------------------------------------------------------------------------------------------------|-----------------------------------------------------------------------------------------------------------------------------------|-----------------------------------------------------------------------------------|-------------------------------------------------------------------------------------------------------------------------------------------------------------------------------------------|----------------------------------------------------------------------|-----------------------------------------------------------------------|
| Bambui | MMSE score cut-off point 13/14 appropriate for Brazilian populations with low schooling <sup>f</sup>                                                                    | MMSE                                                                                                                              | 1. Blood pressure (mean of 2 <sup>nd</sup> and 3 <sup>rd</sup> )<br>2. Medication | Myocardial infarction or angina                                                                                                                                                           | 1. Fasting blood glucose<br>2. Treatment                             | History of stroke                                                     |
| CFAS   | AGECAT organicity level of O3                                                                                                                                           | MMSE                                                                                                                              | History                                                                           | Angina or heart attack                                                                                                                                                                    | History                                                              | History of stroke                                                     |
| CHAS   | DSM-IV or education-adjusted 10/66 Lancet dementia diagnosis; those with CDR $\geq$ 1 but not indicated as having a dementia diagnosis were also excluded               | Community Screening Instrument for Dementia (CSI-D). Scores converted to MMSE with a published co-calibration table <sup>21</sup> | 1. Blood pressure (average)<br>2. History indicated by diagnosis or treatment     | Doctor diagnosed any of heart attack, angina, heart failure, valve disease, or other (such as atrial fibrillation or ventricular arrhythmia or cardiomyopathy)                            | 1. Told had diabetes<br>2. Had treatment<br>3. Fasting blood glucose | Self-report of a clinical diagnosis                                   |
| EAS    | DSM-IV                                                                                                                                                                  | Blessed Information Memory Concentration test. Validated formula was used to convert these scores to MMSE scores <sup>22</sup> .  | 1. Blood pressure (mean of 2)<br>2. History                                       | Myocardial infarction, coronary artery bypass, angina, heart failure, angioplasty, or arrhythmia                                                                                          | 1. History<br>2. Treatment<br>3. Fasting blood glucose               | Medical history of stroke                                             |
| ESPRIT | Standardized interview by a neurologist incorporating cognitive testing, with diagnoses made using the DSM-IV, validated by an independent panel of expert neurologists | MMSE                                                                                                                              | 1. Blood pressure (mean of 2)<br>2. Medication                                    | Ischemic heart disease (defined as any of current angina, history of angioplasty, heart operation or myocardial infarction) or heartbeat disorders (arrhythmia or auricular fibrillation) | 1. Treatment<br>2. Fasting blood glucose                             | Have you had one or more cerebrovascular attacks (strokes, seizures)? |
| HELIAD | Full battery of neuropsychological tests, neurological examination and a consensus diagnosis of Neurologists and Neuropsychologists using DSM-IV criteria               | MMSE                                                                                                                              | History                                                                           | Coronary disease, myocardial infarction, congestive heart failure, arrhythmia, or any other heart disease                                                                                 | History                                                              | Medical history of stroke or TIA                                      |

| Study     | Criteria used to classify dementia                                                      | General Cognition test                                                                      | Hypertension <sup>a</sup>                                                                                                                                   | Cardiovascular disease <sup>b</sup>                                                                                                                                                                                                                   | Diabetes <sup>c</sup>                                                                                                                                                                                   | Stroke <sup>d</sup>                                                                                                                                                                         |
|-----------|-----------------------------------------------------------------------------------------|---------------------------------------------------------------------------------------------|-------------------------------------------------------------------------------------------------------------------------------------------------------------|-------------------------------------------------------------------------------------------------------------------------------------------------------------------------------------------------------------------------------------------------------|---------------------------------------------------------------------------------------------------------------------------------------------------------------------------------------------------------|---------------------------------------------------------------------------------------------------------------------------------------------------------------------------------------------|
| HK-MAPS   | Clinical Dementia Rating $\geq 1$                                                       | MMSE                                                                                        | Cumulative Illness Rating Scale severity rating 1+                                                                                                          | Cumulative Illness Rating Scale severity rating 1+ for either heart disease (ischemic heart disease or heart failure) or arrhythmia/ atrial fibrillation                                                                                              | Cumulative Illness Rating Scale severity rating 1+                                                                                                                                                      | Cumulative Illness Rating Scale severity rating 1+ for cerebrovascular disease (CVA, TIA)                                                                                                   |
| Invece.Ab | DSM-IV                                                                                  | MMSE                                                                                        | 1. Medication<br>2. Supine blood pressure 170-180 mmHg and history<br>3. Supine blood pressure >180 mmHg                                                    | 1. Cardiovascular disease defined by study as any of myocardial infarction, heart failure, angina, arrhythmia, coronary artery bypass graft, or other<br>2. Medication<br>3. Atrial fibrillation                                                      | 1. Treatment<br>2. History                                                                                                                                                                              | History of stroke or TIA                                                                                                                                                                    |
| KLOSCAD   | DSM-IV                                                                                  | MMSE                                                                                        | 1. History (also having follow-up current status data or age first diagnosed/began medication)<br>2. Self-reported current<br>3. Blood pressure (mean of 3) | 1. History of any of myocardial infarction, angina, congestive heart failure, arrhythmia, cardiac operation, or other (also having follow-up current status data or age first diagnosed/began medication)<br>2. Self-reported current cardiac disease | 1. History (also having follow-up current status data or age first diagnosed/began medication)<br>2. Self-reported current<br>3. Fasting blood glucose<br>4. Non-fasting blood glucose $\geq 200$ mg/dL | History of stroke (sometimes indicated only by having data for a follow-up current status), cerebral infarction, cerebral haemorrhage, TIA, cerebral ischaemia, or "something like stroke". |
| LEILA75+  | DSM-IV                                                                                  | MMSE                                                                                        | 1. Blood pressure                                                                                                                                           | Self-reported myocardial infarction                                                                                                                                                                                                                   | Self-reported                                                                                                                                                                                           | Self-reported history of stroke                                                                                                                                                             |
| MoVIES    | Clinical Dementia Rating $\geq 1$                                                       | MMSE                                                                                        | 1. Blood pressure (right or left: n=338; averaged over both: n=67)<br>2. History                                                                            | History of any of myocardial infarction, angina, pacemaker, palpitations, heart murmur, or other (includes reported presence >1 month ago at wave 2)                                                                                                  | History (includes reported presence >1 month ago at wave 2)                                                                                                                                             | History of stroke (includes participants assessed at wave 2 indicating presence >1 month ago)                                                                                               |
| PATH      | DSM-IV                                                                                  | MMSE                                                                                        | 1. Blood pressure (mean of 2)<br>2. Medication                                                                                                              | "Do you have heart trouble?"                                                                                                                                                                                                                          | 1. History<br>2. Treatment                                                                                                                                                                              | "Have you ever suffered a stroke?"                                                                                                                                                          |
| SALSA     | California ADDTC criteria for vascular dementia and NINDS-ADRDA for Alzheimer's disease | Modified MMSE. Scores converted to MMSE with a published co-calibration table <sup>21</sup> | 1. Blood pressure (mean of 2)<br>2. Self-reported<br>3. Medication                                                                                          | Myocardial infarction, angina, congestive heart failure, atrial fibrillation, or heart/coronary catheterization                                                                                                                                       | 1. Self-report<br>2. Fasting blood glucose<br>3. Medication                                                                                                                                             | Self-report                                                                                                                                                                                 |

| Study      | Criteria used to classify dementia                        | General Cognition test | Hypertension <sup>a</sup>                                             | Cardiovascular disease <sup>b</sup>                                                                                             | Diabetes <sup>c</sup>                                                 | Stroke <sup>d</sup>                                |
|------------|-----------------------------------------------------------|------------------------|-----------------------------------------------------------------------|---------------------------------------------------------------------------------------------------------------------------------|-----------------------------------------------------------------------|----------------------------------------------------|
| SGS        | Self-reported medical history                             | MMSE                   | Self-reported history of diagnosis                                    | Self-reported history of diagnosis                                                                                              | Self-reported history of diagnosis                                    | Self-reported history of diagnosis                 |
| SLASI      | DSM-IV                                                    | MMSE                   | 1. Blood pressure (1 reading)<br>2. Medication<br>3. History          | 1. Heart attack, heart failure, or atrial fibrillation<br>2. Medication for heart attack, heart failure, or atrial fibrillation | 1. Fasting blood glucose<br>2. Treatment<br>3. History                | History of stroke or regular medication for stroke |
| Sydney MAS | DSM-IV                                                    | MMSE                   | 1. Blood pressure (mean of 2)<br>2. Medication<br>3. History          | 1. Heart attack, angina, cardiomyopathy, valve disease, arrhythmia, atrial fibrillation                                         | 1. Fasting blood glucose<br>2. Treatment<br>3. History                | Diagnosis of stroke or TIA                         |
| Tajiri     | Clinical Dementia Rating $\geq 1$ , with DSM-IV follow-up | MMSE                   | 1. Blood pressure (mean of 2)<br>2. Medication                        | Ischemic heart disease, or atrial fibrillation                                                                                  | 1. Fasting blood glucose<br>2. Treatment (diet)                       | Medical history                                    |
| ZARADEMP   | DSM-IV                                                    | MMSE                   | Diagnosis using EURODEM Risk Factor Questionnaire and medical records | Diagnosis of myocardial infarction or angina using EURODEM Risk Factor Questionnaire and medical records                        | Diagnosis using EURODEM Risk Factor Questionnaire and medical records | History of stroke or TIA                           |

<sup>a</sup> Any of systolic blood pressure  $\geq 140$  mmHg, diastolic blood pressure  $\geq 90$  mmHg, taking medication for hypertension, or medical history

<sup>b</sup> History of any relevant condition (heart attack, angina, cardiomyopathy, valve disease, arrhythmia, atrial fibrillation, etc.)

<sup>c</sup> Any of fasting blood glucose  $\geq 126$  mg/dL ( $>7$  mmol/L), treatment for diabetes, or medical history

<sup>d</sup> History of stroke or transient ischemic attack

<sup>e</sup> Any of total cholesterol  $\geq 240$  mg/dL ( $>6.2$  mmol/L), triglycerides  $\geq 200$  mg/dL ( $>2.3$  mmol/L), treatment for high cholesterol, or medical history

<sup>f</sup> Castro-Costa E, Fuzikawa C, Uchoa E, Firmo JO, Lima-Costa MF. Norms for the mini-mental state examination: adjustment of the cut-off point in population-based studies (evidences from the Bambui health aging study). *Arq Neuropsiquiatr* 2008;66:524-8.

eTable 4 – Harmonization of Educational Attainment Across Cohorts

| Country               | Study            |                                       | Assigned Educational Category                                                                                                         |                                                                                                                |                                         |                                                                                                   |
|-----------------------|------------------|---------------------------------------|---------------------------------------------------------------------------------------------------------------------------------------|----------------------------------------------------------------------------------------------------------------|-----------------------------------------|---------------------------------------------------------------------------------------------------|
|                       |                  |                                       | Incomplete Elementary                                                                                                                 | Completed Elementary (and incomplete Middle Level)                                                             | Completed Middle (and some High School) | Completed High School (may or may not have completed Tertiary)                                    |
| <b>Brazil</b>         |                  | <b>Education System</b>               | <b>Less than 5 years</b>                                                                                                              | <b>5 to &lt;9 years</b>                                                                                        | <b>9 to &lt;12 years</b>                | <b>12+ years</b>                                                                                  |
|                       | <b>Bambui</b>    | <b>Available categories</b>           | Illiterate; 1-3 years, 4-7 years                                                                                                      | >=8 years                                                                                                      | >=8 years                               | >=8 years                                                                                         |
|                       |                  | <b>Education in Years<sup>a</sup></b> |                                                                                                                                       | Available. Year data used to assign participants to these higher categories                                    |                                         |                                                                                                   |
| <b>United Kingdom</b> |                  | <b>Education System</b>               | <b>Less than &lt;6 years</b>                                                                                                          | <b>6 to &lt;9 years</b>                                                                                        | <b>9 to &lt;11 years</b>                | <b>11+ years</b>                                                                                  |
|                       | <b>CFAS</b>      | <b>Available categories</b>           | None.                                                                                                                                 |                                                                                                                |                                         |                                                                                                   |
|                       |                  | <b>Education in Years</b>             | Available. Year data used to assign participants to a specific level of educational attainment using the Education System information |                                                                                                                |                                         |                                                                                                   |
| <b>Cuba</b>           |                  | <b>Educational System</b>             | <b>Less than 6 years</b>                                                                                                              | <b>6 to &lt;9 years</b>                                                                                        | <b>9 to &lt;12 years</b>                | <b>12+ years</b>                                                                                  |
|                       | <b>CHAS</b>      | <b>Available categories</b>           | None; Some, did not complete primary                                                                                                  | Completed Primary                                                                                              | Completed Primary                       | Completed Secondary; Tertiary                                                                     |
|                       |                  | <b>Education in Years</b>             |                                                                                                                                       | Available. Year data used to assign participants into either Complete Elementary or Complete Middle categories |                                         |                                                                                                   |
| <b>USA</b>            |                  | <b>Educational System</b>             | <b>Less than 5 years</b>                                                                                                              | <b>5 to &lt;8 years</b>                                                                                        | <b>8 to &lt;12</b>                      | <b>12+ years</b>                                                                                  |
|                       | <b>EAS</b>       | <b>Available categories</b>           | <i>No categorical data applicable to these levels of education</i>                                                                    |                                                                                                                |                                         | High School Diploma/GED<br>Bachelors; Masters; Doctorate; Other                                   |
|                       |                  | <b>Education in Years</b>             | Available. Year data used to assign participants to these levels of educational attainment                                            |                                                                                                                |                                         |                                                                                                   |
|                       | <b>MOVIES</b>    | <b>Available categories</b>           | <6th grade                                                                                                                            | 6-9th grade                                                                                                    | Partial high school                     | High School Graduate; Trade/Technical, Partial College<br>College Graduate; Graduate/Professional |
|                       |                  | <b>Education in Years</b>             | Available. Used to assign participants to a level of educational attainment if categorical data missing                               |                                                                                                                |                                         |                                                                                                   |
|                       | <b>SALSA</b>     | <b>Available categories</b>           | None.                                                                                                                                 |                                                                                                                |                                         |                                                                                                   |
|                       |                  | <b>Education in years</b>             | Available. Used to assign participants to a specific level of educational attainment using the Education System information           |                                                                                                                |                                         |                                                                                                   |
| <b>France</b>         |                  | <b>Educational System</b>             | <b>Less than 5 years</b>                                                                                                              | <b>5 to &lt;9 years</b>                                                                                        | <b>9 to &lt;12 years</b>                | <b>12+ years</b>                                                                                  |
|                       | <b>ESPRIT</b>    | <b>Available categories</b>           | <5th Grade                                                                                                                            | 5th Grade; 6th To 9th Grade                                                                                    | Technical 9th Grade;                    | College; College Graduate (including Technical); University                                       |
|                       |                  | <b>Education in Years</b>             | Not available.                                                                                                                        |                                                                                                                |                                         |                                                                                                   |
| <b>Greece</b>         | <b>HELIAD</b>    | <b>Educational System</b>             | <b>Less than 5 years</b>                                                                                                              | <b>5 to &lt;9 years</b>                                                                                        | <b>9 to &lt;12 years</b>                | <b>12+ years</b>                                                                                  |
|                       |                  | <b>Available categories</b>           | None.                                                                                                                                 |                                                                                                                |                                         |                                                                                                   |
|                       |                  | <b>Education in Years</b>             | Available. Used to assign participants to a specific level of educational attainment using the Education System information           |                                                                                                                |                                         |                                                                                                   |
| <b>Hong Kong</b>      | <b>HK-MAPS</b>   | <b>Educational System</b>             | <b>Less than 6 years</b>                                                                                                              | <b>6 to &lt;9 years</b>                                                                                        | <b>9 to &lt;11 years</b>                | <b>11+ years</b>                                                                                  |
|                       |                  | <b>Available categories</b>           | None.                                                                                                                                 |                                                                                                                |                                         |                                                                                                   |
|                       |                  | <b>Education in Years</b>             | Available. Used to assign participants to a specific level of educational attainment using the Education System information           |                                                                                                                |                                         |                                                                                                   |
| <b>Italy</b>          |                  | <b>Educational System</b>             | <b>Less than 5 years</b>                                                                                                              | <b>5 to &lt;8 years</b>                                                                                        | <b>8 to &lt;13 years</b>                | <b>13+ years</b>                                                                                  |
|                       | <b>Invece.Ab</b> | <b>Available categories</b>           | None.                                                                                                                                 |                                                                                                                |                                         |                                                                                                   |
|                       |                  | <b>Education in Years</b>             | Available. Used to assign participants to a specific level of educational attainment using the Education System information           |                                                                                                                |                                         |                                                                                                   |
| <b>South Korea</b>    | <b>KLOSCAD</b>   | <b>Educational System</b>             | <b>Less than 6 years</b>                                                                                                              | <b>6 to &lt;9 years</b>                                                                                        | <b>9 to &lt;12 years</b>                | <b>12+ years</b>                                                                                  |

|                  |               |                                        |                                                                                                                             |                                        |                                                                      |                                                                                                                                                                                                                                                           |                                                                                                                                      |
|------------------|---------------|----------------------------------------|-----------------------------------------------------------------------------------------------------------------------------|----------------------------------------|----------------------------------------------------------------------|-----------------------------------------------------------------------------------------------------------------------------------------------------------------------------------------------------------------------------------------------------------|--------------------------------------------------------------------------------------------------------------------------------------|
|                  |               | <b>Available Categories</b>            | Less Than High School Completion                                                                                            | Less Than High School Completion       | Less Than High School Completion                                     | High School Completion; University Degree                                                                                                                                                                                                                 |                                                                                                                                      |
|                  |               | <b>Education in Years</b>              | Available. Used to assign participants into a level educational attainment below High School                                |                                        |                                                                      |                                                                                                                                                                                                                                                           |                                                                                                                                      |
| <b>Germany</b>   |               | <b>Educational System</b>              | <b>Less than 4 years</b>                                                                                                    | <b>4 to &lt;9 years</b>                | <b>9 to &lt;12 years</b>                                             | <b>12+ years</b>                                                                                                                                                                                                                                          |                                                                                                                                      |
|                  | <b>LEILA</b>  | <b>Available Categories</b>            | <i>No categorical data applicable to these levels of education</i>                                                          |                                        |                                                                      | Lower Secondary Education                                                                                                                                                                                                                                 | Upper Secondary Education; Post-Secondary Non-Tertiary; Short Cycle Tertiary Education; Master Or Equivalent; Doctoral or Equivalent |
|                  |               | <b>Education in Years</b>              | Available. Used to assign participants into a level educational attainment below Middle education                           |                                        |                                                                      |                                                                                                                                                                                                                                                           |                                                                                                                                      |
| <b>Australia</b> |               | <b>Educational System</b>              | <b>Less than 7 years</b>                                                                                                    | <b>7 to &lt;11 years</b>               | <b>11 to &lt;13 years</b>                                            | <b>13+ years</b>                                                                                                                                                                                                                                          |                                                                                                                                      |
|                  | <b>PATH</b>   | <b>Available Categories (PATH)</b>     | Some Primary                                                                                                                | All Of Primary, Some Of Secondary      | Intermediate School Certificate                                      | Five/Six Years of Secondary; Trade Certificate/Apprenticeship; Technicians Certificate/Advanced Certificate; Certificate Other Than Above; Associate Diploma; Undergraduate Diploma; Bachelor's Degree; Post Graduate Diploma/Certificate; Higher Degree; |                                                                                                                                      |
|                  |               | <b>Education in Years</b>              | Available. Used to assign participants to a level of educational attainment if categorical data missing.                    |                                        |                                                                      |                                                                                                                                                                                                                                                           |                                                                                                                                      |
|                  | <b>MAS</b>    | <b>Available Categories</b>            | <i>No categorical data applicable to this category.</i>                                                                     | Primary school, Incomplete High School | Incomplete High School; Incomplete High School + Certificate Diploma | Complete High School; Incomplete Tertiary; Complete High School + Certificate/Diploma; Completed Tertiary                                                                                                                                                 |                                                                                                                                      |
|                  |               | <b>Education in Years</b>              | Available. Used to categorize participants with incomplete Elementary education                                             |                                        |                                                                      |                                                                                                                                                                                                                                                           |                                                                                                                                      |
| <b>Japan</b>     |               | <b>Educational System</b>              | <b>Less than 6 years</b>                                                                                                    | <b>6 to &lt;9 years</b>                | <b>9 to &lt;12</b>                                                   | <b>12+ years</b>                                                                                                                                                                                                                                          |                                                                                                                                      |
|                  | <b>Tajiri</b> | <b>Available Categories</b>            | Less Than High School                                                                                                       | Less Than High School                  | Less Than High School                                                | High School                                                                                                                                                                                                                                               |                                                                                                                                      |
|                  |               | <b>Education in Years</b>              | Available. Used to assign participants to a specific level of educational attainment below High School                      |                                        |                                                                      |                                                                                                                                                                                                                                                           |                                                                                                                                      |
|                  | <b>SGS</b>    | <b>Available Categories</b>            | None.                                                                                                                       |                                        |                                                                      |                                                                                                                                                                                                                                                           |                                                                                                                                      |
|                  |               | <b>Education in Years</b>              | Available. Used to assign participants to a specific level of educational attainment using the Education System information |                                        |                                                                      |                                                                                                                                                                                                                                                           |                                                                                                                                      |
| <b>Singapore</b> |               | <b>Educational System</b>              | <b>Less than 6 years</b>                                                                                                    | <b>6 to &lt;8 years</b>                | <b>8 to &lt;10</b>                                                   | <b>10+ years</b>                                                                                                                                                                                                                                          |                                                                                                                                      |
|                  |               | <b>Available Categories</b>            | Less Than High School Completion                                                                                            | Less Than High School Completion       | Less Than High School Completion                                     | High School Completion, Technical or College Diploma; University Level                                                                                                                                                                                    |                                                                                                                                      |
|                  |               | <b>Education in Years</b>              | Available. Used to assign participants to either Elementary of Middle education                                             |                                        |                                                                      |                                                                                                                                                                                                                                                           |                                                                                                                                      |
| <b>Spain</b>     |               | <b>Educational System</b>              | <b>Less than 6 years</b>                                                                                                    | <b>6 to &lt;8 years</b>                | <b>8 to &lt; 10 years</b>                                            | <b>10+ years</b>                                                                                                                                                                                                                                          |                                                                                                                                      |
|                  |               | <b>Available Categories (ZARADEMP)</b> | None; Less Than Primary                                                                                                     | Primary                                | Less Than High School                                                | High School; College Diploma; Less Than Technical Formation; University Degree                                                                                                                                                                            |                                                                                                                                      |
|                  |               | <b>Education in Years</b>              | Available. Used to assign participants to a level of educational attainment if categorical data missing                     |                                        |                                                                      |                                                                                                                                                                                                                                                           |                                                                                                                                      |

<sup>a</sup> For all studies, the year data was used to assign participants to the relevant level of educational attainment if categorical data was not available, or was not at a level of detail to assign participants to one of the four educational attainment categories.

1. Lima-Costa MF, Firmo JO, Uchoa E. Cohort profile: the Bambui (Brazil) Cohort Study of Ageing. *Int J Epidemiol.* 2011;40(4):862-867.
2. Brayne C, McCracken C, Matthews FE. Cohort profile: the Medical Research Council Cognitive Function and Ageing Study (CFAS). *Int J Epidemiol.* 2006;35(5):1140-1145.
3. Llibre-Rodriguez JJ, Valhuerdi-Cepero A, Lopez-Medina AM, et al. Cuba's Aging and Alzheimer Longitudinal Study. *MEDICC Rev.* 2017;19(1):31-35.
4. Katz MJ, Lipton RB, Hall CB, et al. Age-specific and sex-specific prevalence and incidence of mild cognitive impairment, dementia, and Alzheimer dementia in blacks and whites: a report from the Einstein Aging Study. *Alzheimer Dis Assoc Disord.* 2012;26(4):335-343.
5. Ritchie K, Carriere I, Ritchie CW, Berr C, Artero S, Ancelin ML. Designing prevention programmes to reduce incidence of dementia: prospective cohort study of modifiable risk factors. *BMJ.* 2010;341:c3885.
6. Dardiotis E, Kosmidis MH, Yannakoulia M, Hadjigeorgiou GM, Scarmeas N. The Hellenic Longitudinal Investigation of Aging and Diet (HELIAD): rationale, study design, and cohort description. *Neuroepidemiology.* 2014;43(1):9-14.
7. Wong CH, Leung GT, Fung AW, Chan WC, Lam LC. Cognitive predictors for five-year conversion to dementia in community-dwelling Chinese older adults. *Int Psychogeriatr.* 2013;25(7):1125-1134.
8. Guaita A, Colombo M, Vaccaro R, et al. Brain aging and dementia during the transition from late adulthood to old age: design and methodology of the "Invece.Ab" population-based study. *BMC Geriatr.* 2013;13:98.
9. Han JW, Kim TH, Kwak KP, et al. Overview of the Korean Longitudinal Study on Cognitive Aging and Dementia. *Psychiatry investigation.* 2018;15(8):767-774.
10. Riedel-Heller SG, Busse A, Aurich C, Matschinger H, Angermeyer MC. Prevalence of dementia according to DSM-III-R and ICD-10: results of the Leipzig Longitudinal Study of the Aged (LEILA75+) Part 1. *Br J Psychiatry.* 2001;179:250-254.
11. Jolles J, Houx PJ, Van Boxtel MP, Ponds RW. *The Maastricht Aging Study: Determinants of cognitive aging.* Maastricht: Neuropsych Publishers.; 1995.
12. Ganguli M, Dodge HH, Chen P, Belle S, DeKosky ST. Ten-year incidence of dementia in a rural elderly US community population: the MoVIES Project. *Neurology.* 2000;54(5):1109-1116.
13. Anstey KJ, Christensen H, Butterworth P, et al. Cohort profile: the PATH through life project. *Int J Epidemiol.* 2012;41(4):951-960.
14. Haan MN, Mungas DM, Gonzalez HM, Ortiz TA, Acharya A, Jagust WJ. Prevalence of dementia in older latinos: the influence of type 2 diabetes mellitus, stroke and genetic factors. *J Am Geriatr Soc.* 2003;51(2):169-177.
15. Narazaki K, Nofuji Y, Honda T, Matsuo E, Yonemoto K, Kumagai S. Normative data for the montreal cognitive assessment in a Japanese community-dwelling older population. *Neuroepidemiology.* 2013;40(1):23-29.
16. Feng L, Gwee X, Kua EH, Ng TP. Cognitive function and tea consumption in community dwelling older Chinese in Singapore. *J Nutr Health Aging.* 2010;14(6):433-438.
17. Sczufca M, Menezes PR, Araya R, et al. Risk factors across the life course and dementia in a Brazilian population: results from the Sao Paulo Ageing & Health Study (SPAH). *Int J Epidemiol.* 2008;37(4):879-890.



18. Sachdev PS, Brodaty H, Reppermund S, et al. The Sydney Memory and Ageing Study (MAS): methodology and baseline medical and neuropsychiatric characteristics of an elderly epidemiological non-demented cohort of Australians aged 70-90 years. *Int Psychogeriatr*. 2010;22(8):1248-1264.
19. Meguro K, Ishii H, Kasuya M, et al. Incidence of dementia and associated risk factors in Japan: The Osaki-Tajiri Project. *J Neurol Sci*. 2007;260(1-2):175-182.
20. Lobo A, Saz P, Marcos G, et al. The ZARADEMP Project on the incidence, prevalence and risk factors of dementia (and depression) in the elderly community: II. Methods and first results. *Eur J Psychiatry*. 2005;19:40-54.
21. Crane PK, Narasimhalu K, Gibbons LE, et al. Item response theory facilitated cocalibrating cognitive tests and reduced bias in estimated rates of decline. *Journal of clinical epidemiology*. 2008;61(10):1018-1027.e1019.
22. Thal LJ, Grundman M, Golden R. Alzheimer's disease: a correlational analysis of the Blessed Information-Memory-Concentration Test and the Mini-Mental State Exam. *Neurology*. 1986;36(2):262-264.
